# Supplementary material for: Novel Endometrial Cancer Models Using Sensitive Metastasis Tracing for CXCR4-Targeted Therapy in Advanced Disease
Source: MDPI journal article supplement (doi:10.3390/biomedicines10071680), 2022-07-12
Supplement: s1 [file s1]

# Supplemental Material

## Novel Endometrial Cancer Models Using Sensitive Metastasis Tracing for CXCR4-Targeted Therapy in Advanced Disease

Esperanza Medina-Gutiérrez <sup>1,2</sup>, María Virtudes Céspedes <sup>1</sup>, Alberto Gallardo <sup>3</sup>,  
Elisa Rioja-Blanco <sup>1,2</sup>, Miquel Àngel Pavón <sup>4,5,6</sup>, Laura Asensio-Puig <sup>7</sup>, Lourdes Farré <sup>4,7</sup>,  
Lorena Alba-Castellón <sup>1,2</sup>, Ugutz Unzueta <sup>1,2,8,9</sup>, Antonio Villaverde <sup>8,9,10</sup>, Esther Vázquez <sup>8,9,10,\*</sup>,  
Isolda Casanova <sup>1,2,8,\*</sup> and Ramon Mangués <sup>1,2,8,\*</sup>

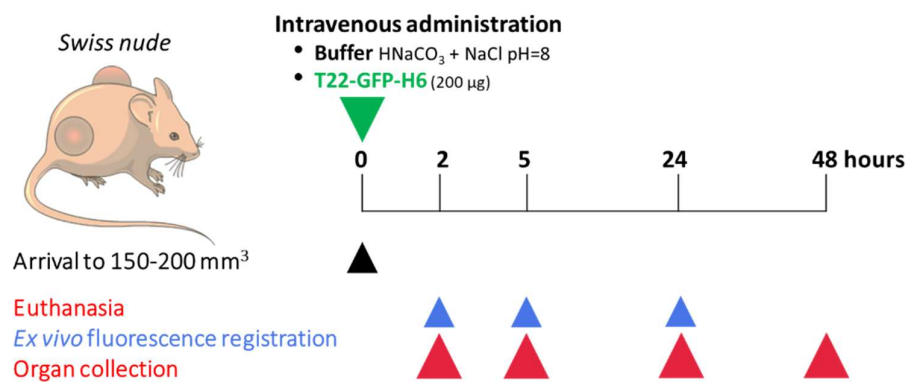

**Figure S1.** Experimental design of the *in vivo* evaluation of T22-GFP-H6 biodistribution, carried on in the subcutaneous tumor model derived from CXCR4+ AN3CA endometrial cancer cell line in Swiss nude mice. Once the tumor reached 150 to 200 mm<sup>3</sup>, mice received a single intravenous bolus of either buffer or 200 µg T22-GFP-H6 (n=3-4/group) and were euthanized 2, 5, 24 or 48 hours after the administration.

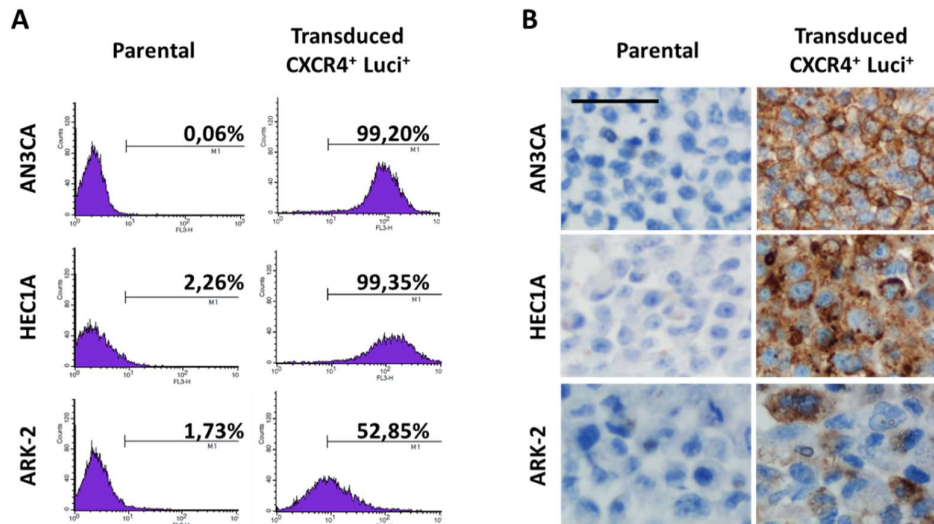

**Figure S2. Comparison of the percentage of CXCR4<sup>+</sup> cells with membrane expression after transduction with CXCR4-Luciferase constructs in human endometrial cancer cell lines.** Representative images of CXCR4 expression in parental or lentivirally transduced AN3CA, HEC1A and ARK-2 cell lines, assessed by: **A. Flow cytometry** of suspended cells stained with anti-CXCR4 antibody. **B. CXCR4 immunocytochemistry** staining with anti-CXCR4 antibody on cell pellets. Bar: 50  $\mu$ m.

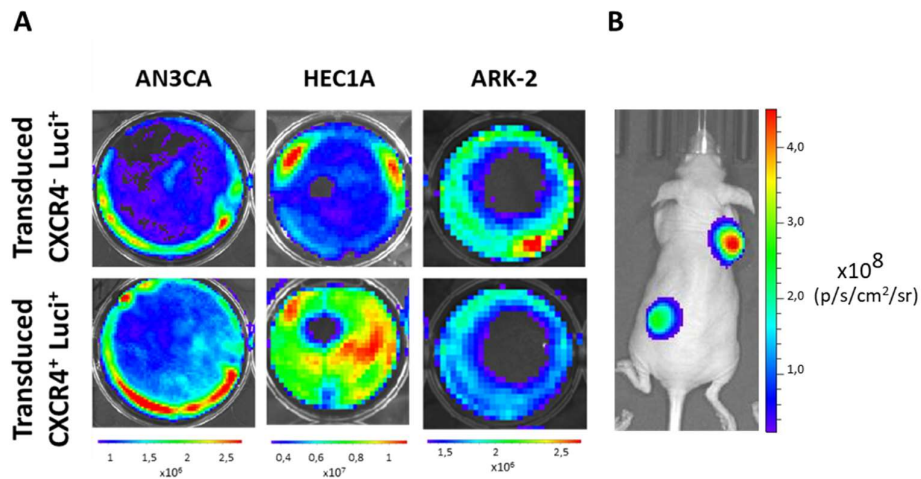

**Figure S3. Luciferase activity in transduced human endometrial cancer cell lines AN3CA, ARK2 and HEC1A *in vitro* (A) and in a subcutaneous model (B) derived from the implantation of CXCR4<sup>+</sup> Luciferase<sup>+</sup> AN3CA cells.**

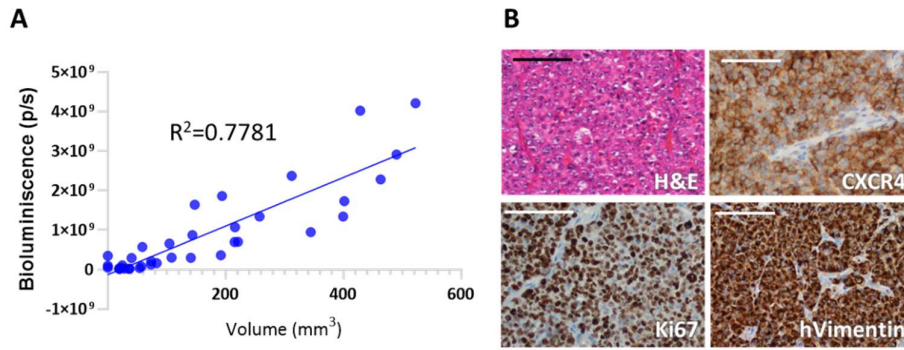

**Figure S4. Tumor growth and phenotypic characterization of the human CXCR4<sup>+</sup> AN3CA cell line-derived subcutaneous cancer mouse model.** Swiss nude mice were implanted with 10<sup>7</sup> CXCR4<sup>+</sup> Luciferase<sup>+</sup> AN3CA cells, to assess bioluminescence emission and tumor growth over time. **A. Correlation between tumor volume and bioluminescence** emitted by tumor cells (n=8; p<0.0001). **B. Phenotypic histopathologic characterization of tumor tissue** stained with hematoxylin-eosin (H&E) and marker characterization of human cells in a tumor containing mouse stroma, using immunohistochemical staining for anti-human CXCR4, Ki67 or human vimentin (hVimentin) antibodies. Bar: 100  $\mu$ m.

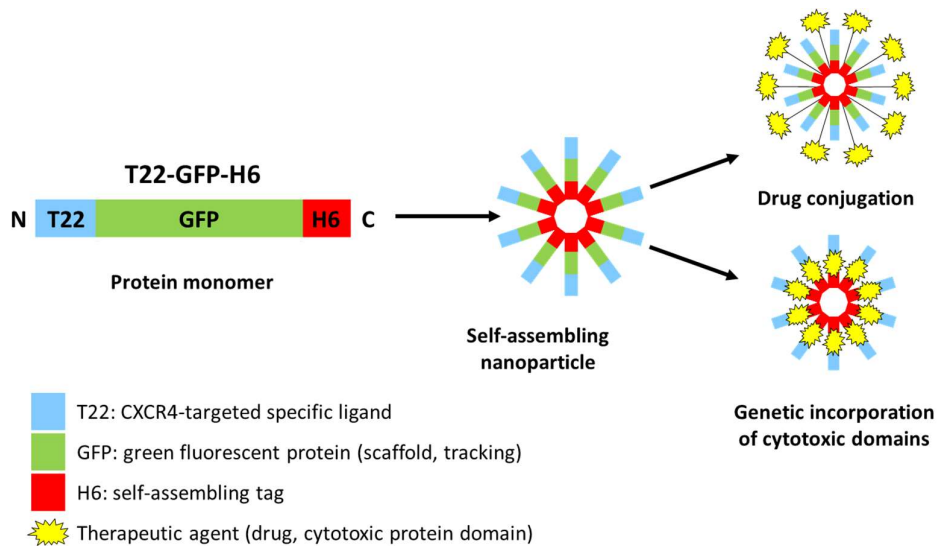

**Figure S5. Schematic design and functional versatility of CXCR4-targeted nanocarrier T22-GFP-H6, capable of generating nanomedicines targeting this receptor.**

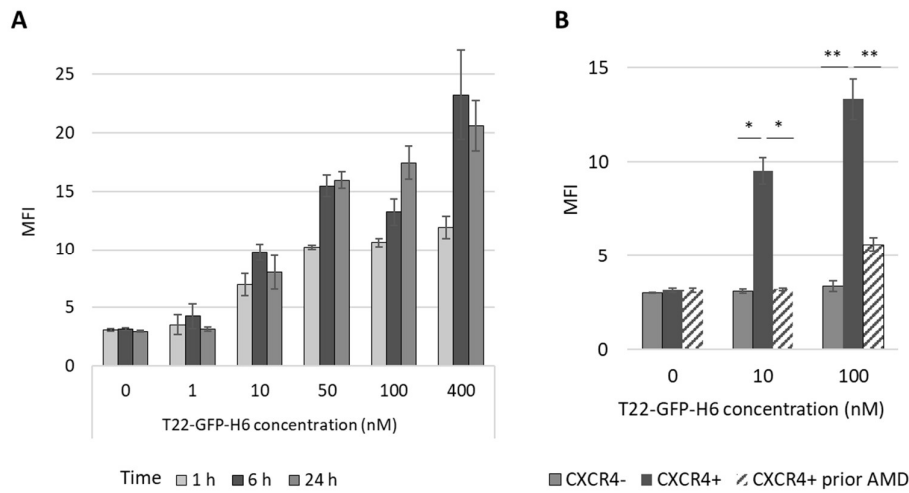

**Figure S6. *In vitro* CXCR4-dependent internalization of T22-GFP-H6 in CXCR4<sup>+</sup> EC AN3CA cells.** A. T22-GFP-H6 internalization in CXCR4<sup>+</sup> AN3CA cells at 1, 6 and 24 h and different concentrations, expressed as mean fluorescent intensity (MFI). B. **Blockage of T22-GFP-H6 internalization at 6 hours, measured by flow cytometry**, in CXCR4<sup>-</sup> AN3CA cells, CXCR4<sup>+</sup> AN3CA cells and CXCR4<sup>+</sup> AN3CA cells after 1h pretreatment with 1  $\mu$ M of the CXCR4 antagonist AMD3100. T22-GFP-H6 internalization in CXCR4<sup>+</sup> cancer cells is expressed as mean fluorescence intensity (MFI). Mean $\pm$ s.e.m; \*p<0.05; \*\* p<0.01.
